# Supplementary material
Source: publisher site journal article supplement (https://www.dovepress.com/article/415766)
Supplement: Supplementary file 1 [file get_supplementary_file.php]

**Supplemental Table 1:** Parent and Child Survey Questions and Response Options

|  | **Question** | **Response Options** |
| --- | --- | --- |
| **Parent Survey** | P1. How many nights did your child use the Tarsus Patch? | 0, 1, 2, 3 |
| P2. Did you ever have to remove the Tarsus Patch prematurely? | Yes (explain), No |
| P3. Were there any complications that resulted from using the patch? If yes, please explain | Yes (explain), No |
| P4. Please rate how comfortable it was for your child to wear the Tarsus Patch | Very comfortable, Somewhat comfortable, Neutral, Somewhat uncomfortable, very uncomfortable |
| P5. Please rate how comfortable it was for your child to peel off the Tarsus Patch | Very comfortable, Somewhat comfortable, Neutral, Somewhat uncomfortable, very uncomfortable |
| P6. Please rate how easy it was for you to put the Tarsus Patch on your child | Very easy, easy, neutral, difficult, very difficult |
| P7. Please rate how effective you thought the Tarsus Patch was at closing your child’s eyelids | Very effective, moderately effective, neutral, ineffective, very ineffective |
| P8. Would you like to use the Tarsus Patch again? | Yes, No, Maybe |
| P9. What methods of eyelid closure has your child used before? | Medical tape, steri strips (3M), tegaderm (3M), eyelocc (KLZ Medical), Sharn Eyegard (Sharn Inc.), Other: |
| P10. Which of the above methods did you use most often? | Medical tape, steri strips (3M), tegaderm (3M), eyelocc (KLZ Medical), Sharn Eyegard (Sharn Inc.), Other: |
| P11. Would you prefer using the Tarsus Patch more than [answer to above question]? And why? | Yes, No, Maybe. Why? |
| P12. Please offer any additional comments you may have about the Tarsus Patch: |  |
| **Child Survey** | C1. How did it feel when you wore the Tarsus Patch? | Very comfortable, Somewhat comfortable, Neutral, Somewhat uncomfortable, very uncomfortable |
| C2. How did it feel when you took off the Tarsus Patch? | Very comfortable, Somewhat comfortable, Neutral, Somewhat uncomfortable, very uncomfortable |
| C3. If you have to use something to close your eyes, would you use the Tarsus Patch again? | Yes, No, Maybe |
| C4. Would you like to use the Tarsus Patch more than [answer to Parent question #10]? And why? | Yes, No, Maybe, Why? |
| C5. Is there anything else you want to say about the Tarsus Patch? |  |
